# Supplementary material for: Oxa-thia-, oxa-selena and crown ether macrocyclic complexes of tin(ii) tetrafluoroborate and hexafluorophosphate – synthesis, properties and structures
Source: Royal Society of Chemistry journal article supplement (doi:10.1039/c3dt51889b), 2013-01-01

## ESI

### Oxa-thia-, oxa-selena and crown ether macrocyclic complexes of tin(II) tetrafluoroborate and hexafluorophosphate – synthesis, properties and structures.

Christopher Beattie, Paolo Farina, William Levason and Gillian Reid

Packing diagram for  $[\text{Sn}(\text{18-crown-6})\text{F}]\text{PF}_6$

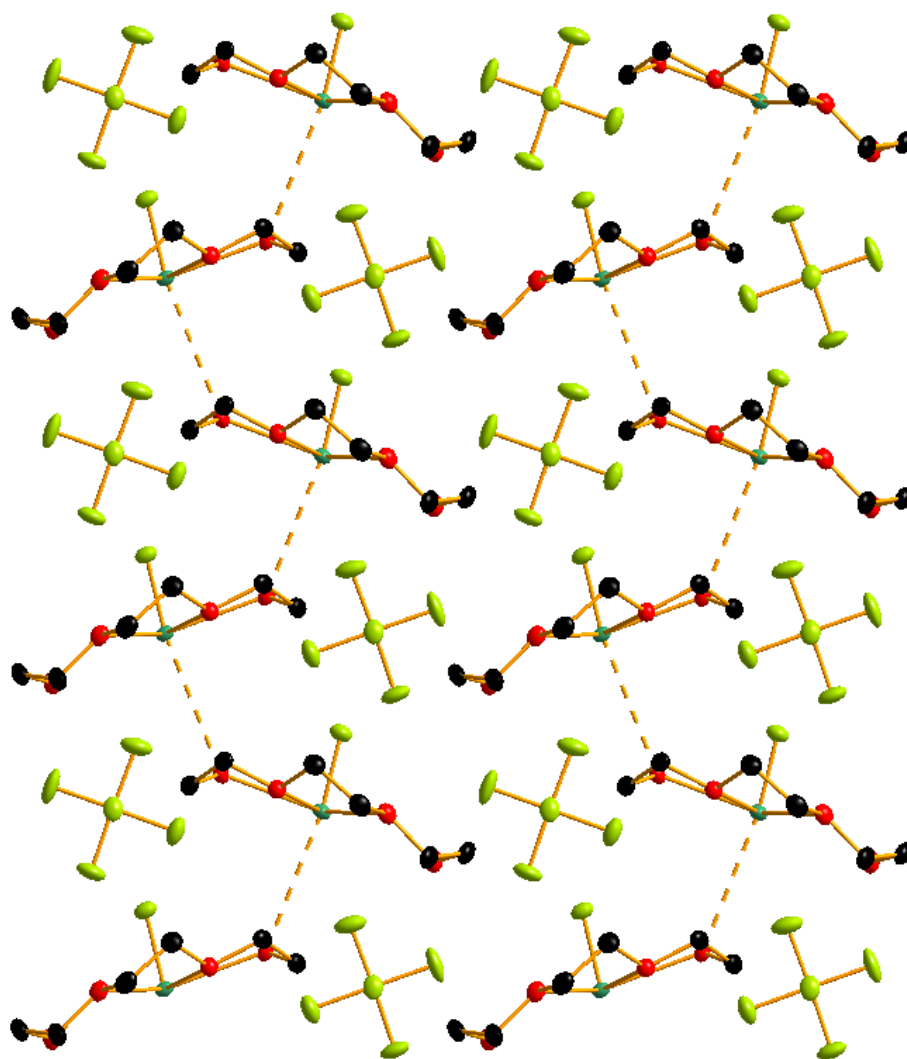

Supplement: c3dt51889b.pdf [file c3dt51889b.pdf]
